# Supplementary material for: A Whole-Genome Sequencing-Based Approach for the Characterization of Klebsiella pneumoniae Co-Producing KPC and OXA-48-like Carbapenemases Circulating in Sardinia, Italy
Source: MDPI journal article supplement (doi:10.3390/microorganisms11092354), 2023-09-20
Supplement: s1 [file s1]

Table S1: Plasmids identified and resistance genes carried

| Homologous plasmid (Genbank acc. n°)                                    | N° of strains (%) | Total resistance genes identified                                                                                                 |
|-------------------------------------------------------------------------|-------------------|-----------------------------------------------------------------------------------------------------------------------------------|
| <i>Klebsiella pneumoniae</i> plasmid pGMI16-005_01 (CP028181)           | 17/17 (100)       | aacA1, KPC3/31, OXA-9, TEM-122                                                                                                    |
| <i>Klebsiella pneumoniae</i> plasmid pCMY2_085072 (CP028804)            | 17/17 (100)       | AAC(6')-Ib9, aadA2.APH(3')-Ia, APH(3'')-Ib, APH(3')-VI, APH(6)-Id, CMY-59, dfrA12, floR, mphA, OXA-9, sul1, sul2, TEM-122, tet(A) |
| <i>Shigella</i> sp. plasmid pLN126_33(HE578058)                         | 17/17 (100)       | -                                                                                                                                 |
| <i>Klebsiella pneumoniae</i> plasmid pKpQIL-SC29 (NC_021656)            | 17/17 (100)       | -                                                                                                                                 |
| <i>Salmonella enterica</i> plasmid pSQR1 (KJ187750)                     | 11/17 (64.7)      | OXA-181, qnrS1                                                                                                                    |
| <i>Klebsiella pneumoniae</i> plasmid pKpN06-NDM7 (CP012995)             | 9/17 (52.9)       | AAC(6')-Ib9, ANT(3'')-Iia, APH(3')-Ia, arr-2, cmlA5, dfrA14, OXA-9, OXA-10, OXA-181, qnrS1, TEM-122                               |
| <i>Klebsiella pneumoniae</i> plasmid pUCLA OXA232-2 (CP012563)          | 5/17 (29.4)       | AAC(6')-Ib9, ANT(3'')-Iia, APH(3')-Ia, arr-2, cmlA5, dfrA14, OXA-9, OXA-10, TEM-122                                               |
| <i>Salmonella enterica</i> plasmid pHLR25 (NC_019110)                   | 5/17 (29.4)       | OXA-181, qnrS1                                                                                                                    |
| <i>Klebsiella pneumoniae</i> plasmid pIncX3 (CP035910)                  | 2/17 (11.8)       | ANT(3'')-Iia, APH(3')-Ia, arr-2, cmlA5, dfrA14, OXA-9, OXA-10, TEM-122                                                            |
| <i>Klebsiella variicola</i> strain plasmid p2_020019 (CP028550)         | 2/17 (11.8)       | aadA2, APH(3'')-Ib, APH(3')-VI, APH(6)-Id, CMY-59, dfrA12, floR, mphA, sul1, sul2, TEM-122, tet(A)                                |
| <i>Klebsiella pneumoniae</i> strain AR_0075 plasmid unnamed5 (CP032190) | 1/17 (5.9)        | AAC(6')-Ib9, APH(3')-Ia, arr-2, cmlA5, dfrA14, OXA-10, TEM-122                                                                    |
